# Supplementary material for: TRIB2 regulates normal and stress-induced thymocyte proliferation
Source: PubMed Central journal article supplement (PMC4860960; doi:10.1038/celldisc.2015.50), 2016-03-15
Supplement: celldisc201550-s1.pdf [file celldisc201550-s1.pdf]

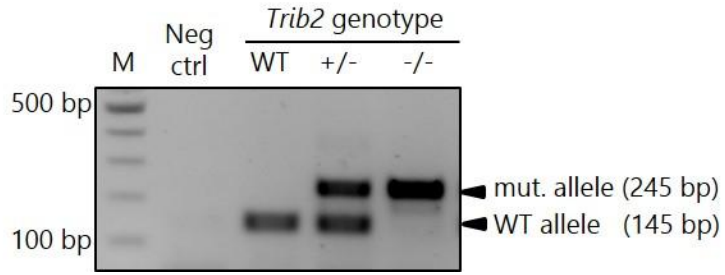

**Figure S1.** *Trib2* genotyping by genomic DNA PCR. A representative gel electrophoresis image showing resolution of PCR products amplified from WT, *Trib2*<sup>+/-</sup> and *Trib2*<sup>-/-</sup> mice using primers listed in Table S1. M, marker; Neg ctrl, no template negative control; mut, mutant.
