# Supplementary material for: TRIB2 regulates normal and stress-induced thymocyte proliferation
Source: PubMed Central journal article supplement (PMC4860960; doi:10.1038/celldisc.2015.50), 2016-03-15
Supplement: celldisc201550-s2.pdf [file celldisc201550-s2.pdf]

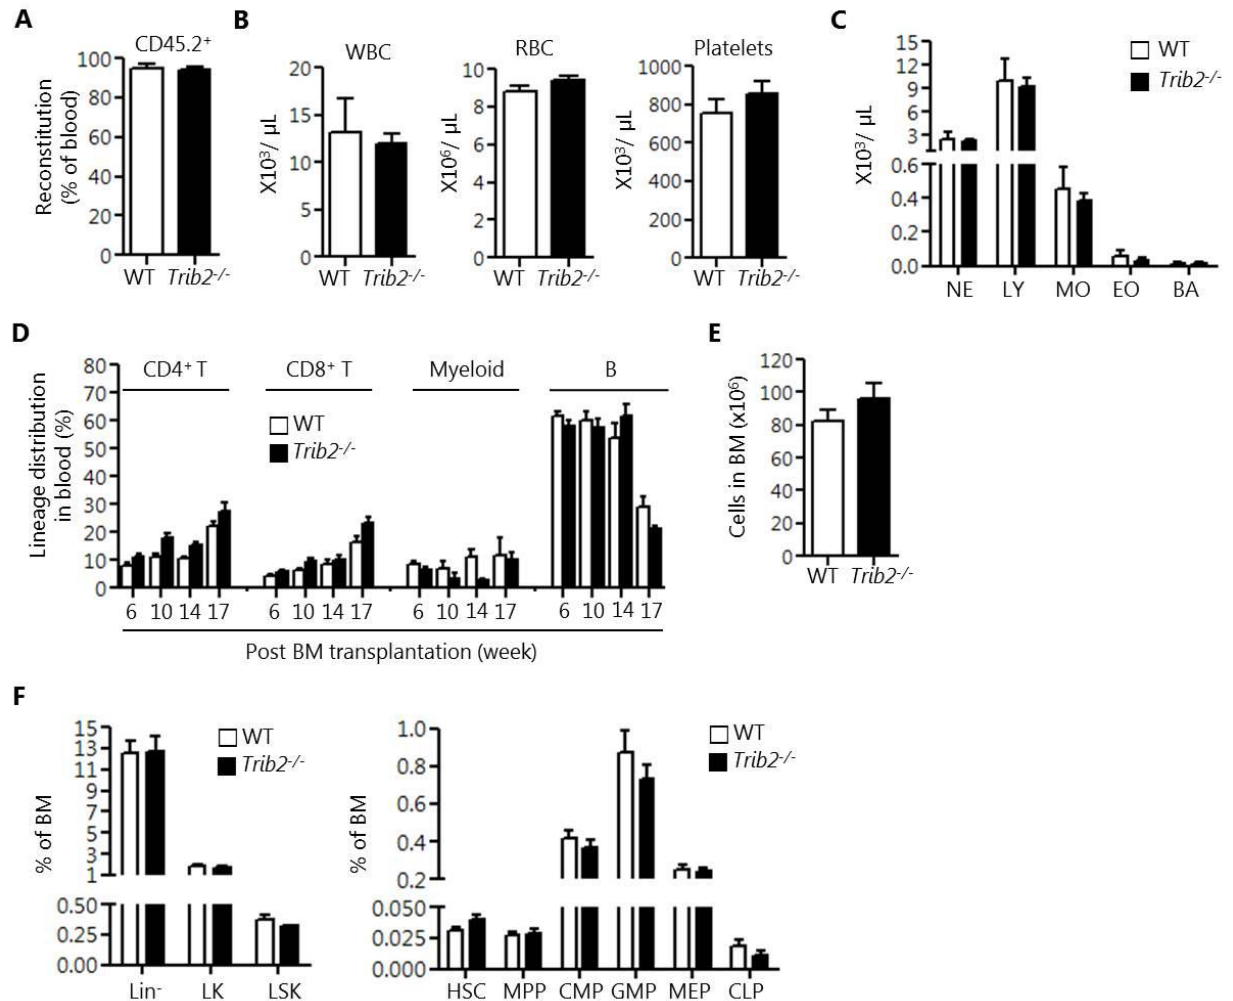

**Figure S2.** TRIB2 loss does not affect the repopulation capability of BM HSPCs. Lethally irradiated CD45.1<sup>+</sup> mice were transplanted with CD45.2<sup>+</sup> WT ( $n = 5$ ) or *Trib2*<sup>-/-</sup> ( $n = 5$ ) whole BM cells, and sacrificed after 17 weeks of transplantation. **(A)** Engraftment of donor cells was determined by measurement of CD45.2 expression in the blood of transplanted mice. Complete blood counts **(B)** and WBC differential counts **(C)** of these two groups of mice were determined by hematology analyzer. NE, neutrophils; LY, lymphocytes; MO, monocytes; EO, eosinophils; BA, basophils. **(D)** The distribution of donor derived mature myeloid, B and T cells in the blood of these mice was measured by flow cytometry. **(E)** BM cellularity was counted by trypan blue exclusion after RBC lysis of the cell suspension **(F)** Immunophenotyping and quantification of donor derived HSPCs (HSC, MPP, CMP, GMP, MEP and CLP) in BM. Lin, lineage; LK, Lin<sup>-</sup>c-

Kit<sup>+</sup> cells; LSK, Lin<sup>-</sup>Sca-1<sup>+</sup>c-Kit<sup>+</sup> cells; HSC: LSK CD150<sup>+</sup>CD48<sup>-</sup>; MPP: LSK CD150<sup>-</sup>CD48<sup>-</sup>; CMP: LK CD34<sup>+</sup>CD16/32<sup>lo</sup>; GMP: LK CD34<sup>+</sup>CD16/32<sup>hi</sup>; MEP: LK CD34<sup>-</sup>CD16/32<sup>-</sup>; CLP: Lin<sup>-</sup>IL-7R $\alpha$ <sup>+</sup>. All quantified data are presented as mean and SEM.
