# Supplementary material for: TRIB2 regulates normal and stress-induced thymocyte proliferation
Source: PubMed Central journal article supplement (PMC4860960; doi:10.1038/celldisc.2015.50), 2016-03-15
Supplement: celldisc201550-s3.pdf [file celldisc201550-s3.pdf]

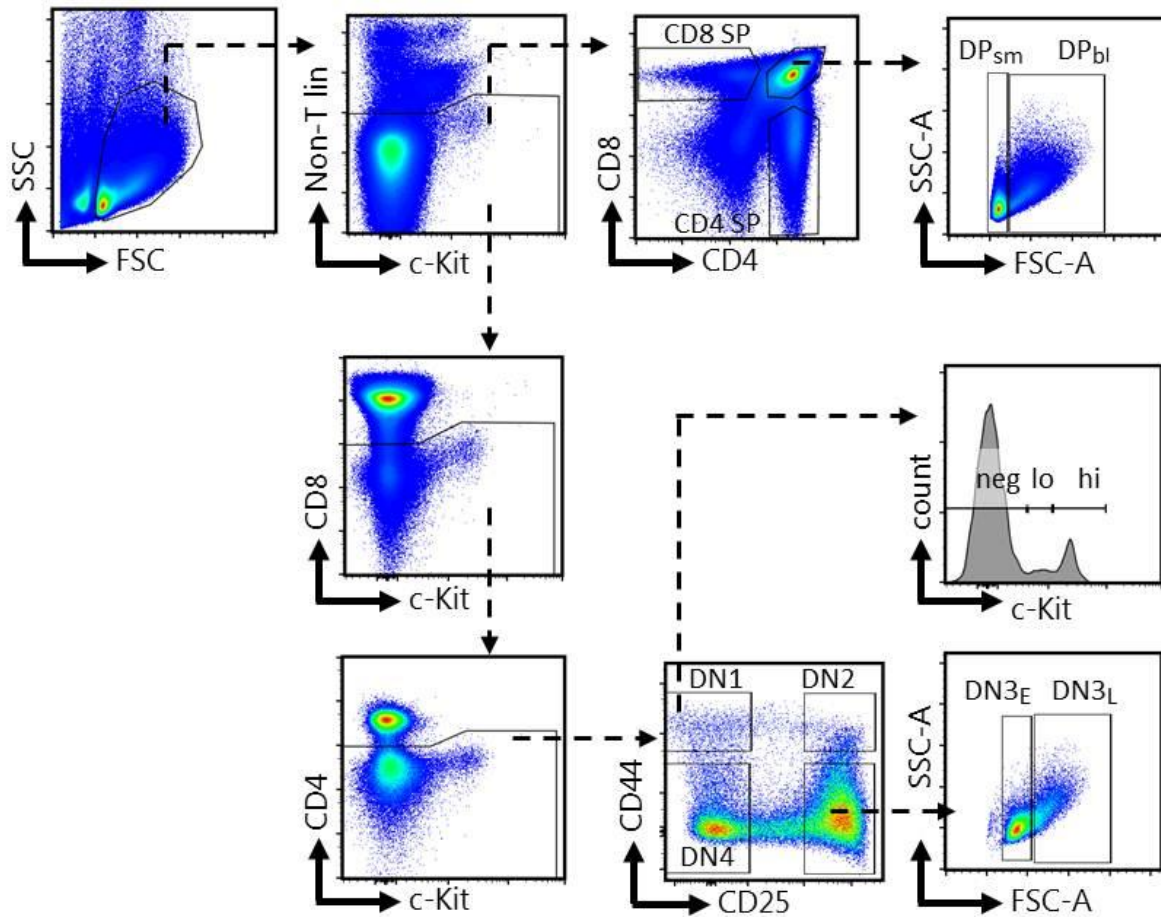

**Figure S3.** Gating strategy to identify thymic subsets. FSC-A, forward scatter-area; SSC-A, side scatter-area; DN1:  $\text{Lin}^{\text{lo}}\text{CD44}^+\text{CD25}^-$ ; DN2:  $\text{Lin}^{\text{lo}}\text{CD44}^+\text{CD25}^+$ ; DN3<sub>E</sub>:  $\text{Lin}^{\text{lo}}\text{CD44}^-\text{CD25}^+\text{FSC}^{\text{lo}}$ ; DN3<sub>L</sub>:  $\text{Lin}^{\text{lo}}\text{CD44}^-\text{CD25}^+\text{FSC}^{\text{hi}}$ ; DN4:  $\text{Lin}^{\text{lo}}\text{CD44}^-\text{CD25}^-$ ; DP<sub>bl</sub>:  $\text{CD4}^+\text{CD8}^+\text{FSC}^{\text{hi}}$ ; DP<sub>sm</sub>:  $\text{CD4}^+\text{CD8}^+\text{FSC}^{\text{lo}}$ ; CD4 SP:  $\text{CD4}^+\text{CD8}^-$ ; CD8 SP:  $\text{CD4}^-\text{CD8}^+$ .
