# Supplementary material for: TRIB2 regulates normal and stress-induced thymocyte proliferation
Source: PubMed Central journal article supplement (PMC4860960; doi:10.1038/celldisc.2015.50), 2016-03-15
Supplement: celldisc201550-s4.pdf [file celldisc201550-s4.pdf]

**A**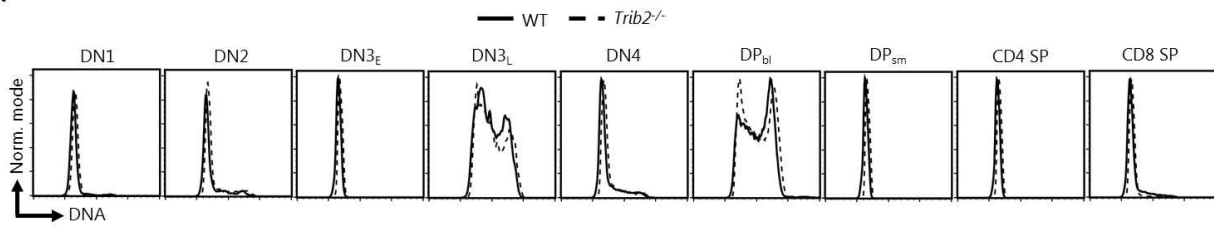**B**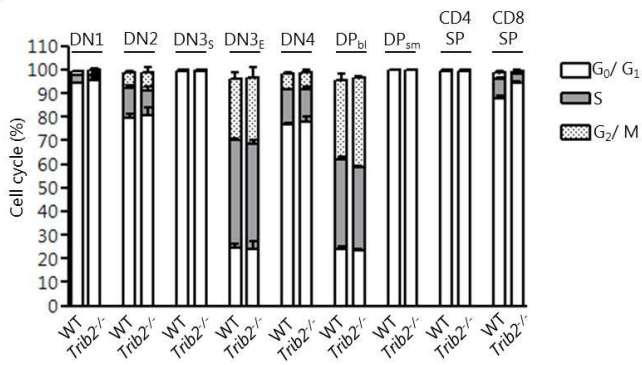**C**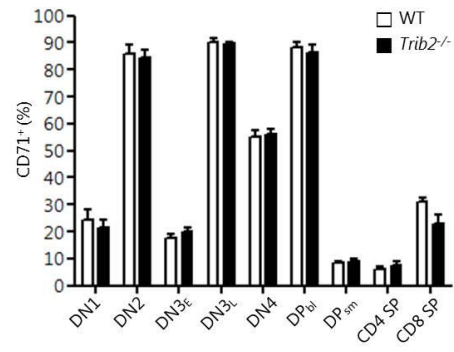

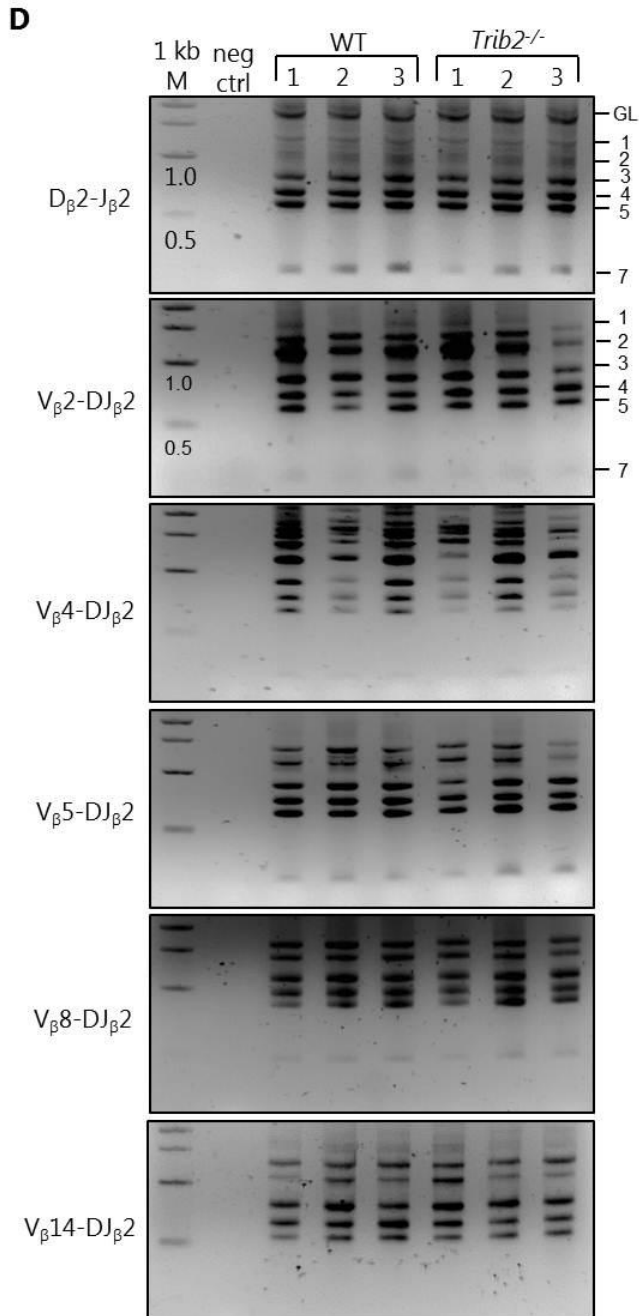

**Figure S4.** Characterization of WT and *Trib2*<sup>-/-</sup> thymic subsets. Overlay of a representative cell cycle profile **(A)** of WT and *Trib2*<sup>-/-</sup> thymic subsets and the fractions of cell cycle phases were graphed in **(B)**. Norm, normalized. **(C)** Quantification of CD71 expression of each thymic subset. **(D)** Endogenous *Tcrb* rearrangements of WT and *Trib2*<sup>-/-</sup> total thymocytes were analyzed by genomic DNA PCR. GL denotes the position of the germline PCR product and number indicates

the different rearrangements involving the  $J_{\beta}2.1$  to  $J_{\beta}2.7$  gene segments. 1 kb M, 1 kb DNA marker; neg ctrl, no template negative control. For **A-D**,  $n = 3$  per genotype. All quantified data are presented as mean and SEM.
