# Supplementary material for: TRIB2 regulates normal and stress-induced thymocyte proliferation
Source: PubMed Central journal article supplement (PMC4860960; doi:10.1038/celldisc.2015.50), 2016-03-15
Supplement: celldisc201550-s5.pdf [file celldisc201550-s5.pdf]

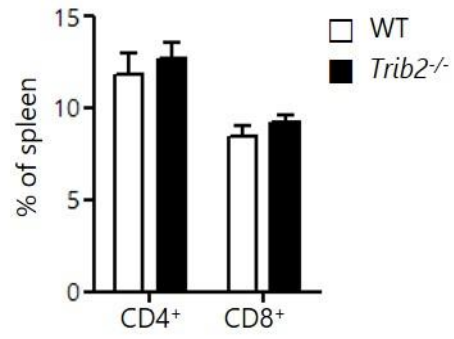

**Figure S5.** Distribution of CD4<sup>+</sup> and CD8<sup>+</sup> T cells in the spleen of WT ( $n = 4$ ) and Trib2<sup>-/-</sup> ( $n = 5$ ) mice at steady state. All quantified data are presented as mean and SEM.
