# Supplementary material for: TRIB2 regulates normal and stress-induced thymocyte proliferation
Source: PubMed Central journal article supplement (PMC4860960; doi:10.1038/celldisc.2015.50), 2016-03-15
Supplement: celldisc201550-s6.pdf [file celldisc201550-s6.pdf]

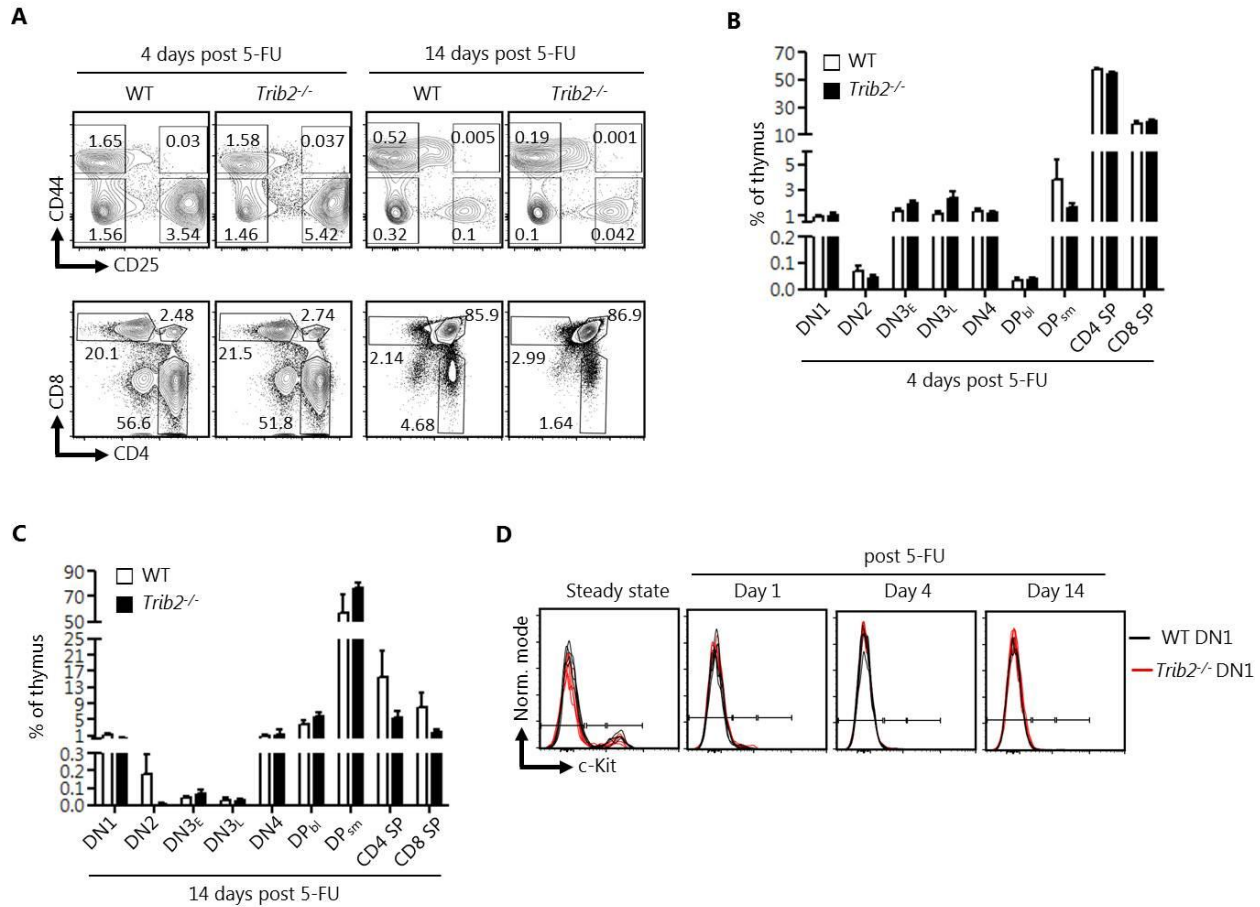

**Figure S6.** Distribution of thymic subsets after genotoxic insult. **(A)** A representative staining profile of WT and *Trib2*<sup>-/-</sup> thymus ( $n = 9$  per genotype per studied time point) after 4 and 14 days of 5-FU treatment (250 mg/kg, i.p.) were shown here. The values indicated in the outlined areas are frequency of each thymic subset and graphed in **(B,C)**. **(D)** c-Kit expression of WT and *Trib2*<sup>-/-</sup>DN1 thymocytes at steady state ( $n = 7-8$  per genotype) and after 5-FU treatment (250 mg/kg, i.p.;  $n = 4-6$  per genotype per studied time point) were shown in overlaid histograms. All quantified data are presented as mean and SEM.
