# Supplementary material for: TRIB2 regulates normal and stress-induced thymocyte proliferation
Source: PubMed Central journal article supplement (PMC4860960; doi:10.1038/celldisc.2015.50), 2016-03-15
Supplement: celldisc201550-s7.pdf [file celldisc201550-s7.pdf]

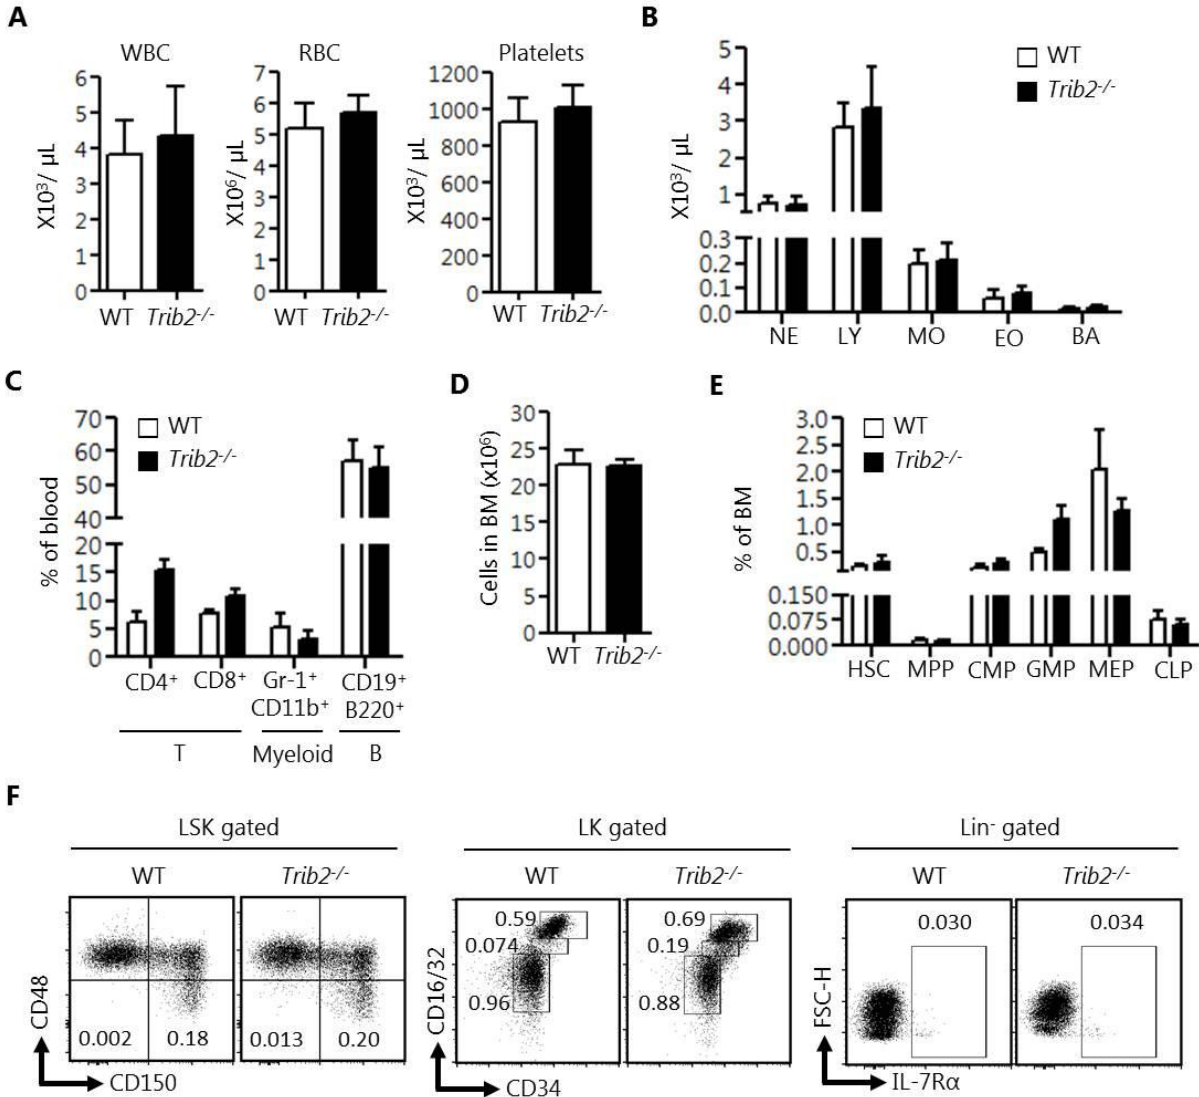

**Figure S7.** TRIB2 loss does not affect the restoration of hematopoietic system after 14 days of 5-FU treatment (250 mg/kg, i.p.). Complete blood counts **(A)** and WBC differential counts **(B)** of treated WT and *Trib2*<sup>-/-</sup> mice ( $n = 8-9$  per genotype) were determined by hematology analyzer. **(C)** The distribution of mature myeloid, B and T cells in the blood of treated WT and *Trib2*<sup>-/-</sup> mice ( $n = 4-5$  per genotype) were measured by flow cytometry. **(D)** BM cellularity was counted by trypan blue exclusion after RBC lysis of the cell suspension harvested from two pelvises, femurs and tibias. **(E)** Distribution of HSPC populations in BM of treated WT and *Trib2*<sup>-/-</sup> mice. **(F)** A

representative staining profile of the HSPC populations measured in WT and *Trib2*<sup>-/-</sup> mice is shown here. For **D-F**,  $n = 3$  per genotype. All quantified data are presented as mean and SEM.
