# Supplementary material for: TRIB2 regulates normal and stress-induced thymocyte proliferation
Source: PubMed Central journal article supplement (PMC4860960; doi:10.1038/celldisc.2015.50), 2016-03-15
Supplement: celldisc201550-s8.pdf [file celldisc201550-s8.pdf]

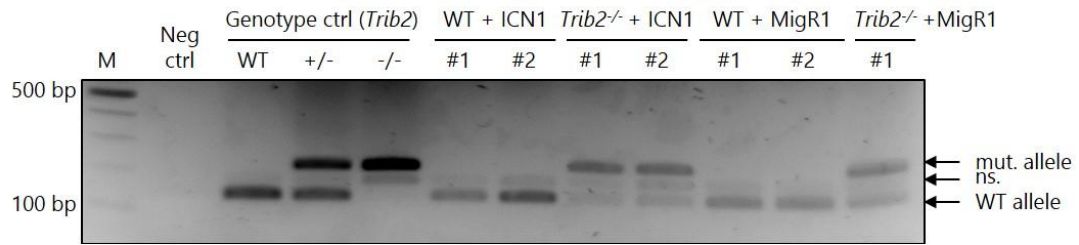

**Figure S8.** Mice in different groups of transplant experiments were verified by *Trib2* genotyping using splenic total genomic DNA. PCR analysis of representative samples from different groups is shown here. ns, non specific.
