# Supplementary material for: TRIB2 regulates normal and stress-induced thymocyte proliferation
Source: PubMed Central journal article supplement (PMC4860960; doi:10.1038/celldisc.2015.50), 2016-03-15
Supplement: celldisc201550-s10.pdf [file celldisc201550-s10.pdf]

**Table S1.** Primers used for *Trib2* genotyping.

| PCR primers           | 5'>3' sequence        |
|-----------------------|-----------------------|
| Primer 1 <sup>A</sup> | CACAATAGCGAGATATGGGAG |
| Primer 2              | GCAATGCGACAAGTTCGGAG  |
| Primer Neo3A          | GCAGCGCATCGCCTTCTATC  |

<sup>A</sup> anneals to genome sequence deleted in the disrupted region of *Trib2* exon 1.
