# Supplementary material for: TRIB2 regulates normal and stress-induced thymocyte proliferation
Source: PubMed Central journal article supplement (PMC4860960; doi:10.1038/celldisc.2015.50), 2016-03-15
Supplement: celldisc201550-s11.pdf [file celldisc201550-s11.pdf]

**Table S2.** Primers used for quantitative qRT-PCR.

| Gene         | Forward primer (5' > 3')        | Reverse primer (5' > 3') |
|--------------|---------------------------------|--------------------------|
| <i>Trib1</i> | CTTCAAGCAGATTGTCTCCGC           | CTAAGCTGGGTTCTCTCCTCC    |
| <i>Trib2</i> | AGCCAGACTGTTCTACCAGA            | GGCGTCTTCCAGGCTTTCCA     |
| <i>Abl</i>   | TGGAGATAACACTCTAAGCATAACTAAAGGT | GATGTAGTTGCTTGGGACCCA    |
| <i>B2m</i>   | TTGTCTTTCAGCAAGGACTGG           | ATGCGGCATCTTCTAACCTCC    |
| <i>Enox2</i> | GAGCTGGAGGGAACCTGATTT           | CACTGGCACTACCAAACCTGCA   |
| <i>Rnf20</i> | GGTGTCTCTTCAACGGAGGAA           | TAGTGAGGCATCATCAGTGGC    |
