# Supplementary material for: TRIB2 regulates normal and stress-induced thymocyte proliferation
Source: PubMed Central journal article supplement (PMC4860960; doi:10.1038/celldisc.2015.50), 2016-03-15
Supplement: celldisc201550-s12.pdf [file celldisc201550-s12.pdf]

**Table S3.** Primers used for detection of endogenous *Tcrb* rearrangements.

|                | <i>Tcrb</i> locus | 5'>3' sequence            | Annealing temperature (°C)  |
|----------------|-------------------|---------------------------|-----------------------------|
| Forward primer | Dβ2               | GTAGGCACCTGTGGGGAAGAACT   | 58                          |
|                | Vβ2               | GGGTCACTGATACGGAGCTG      | 58                          |
|                | Vβ4               | GGACAATCAGACTGCCTCAAGT    | 58                          |
|                | Vβ5.1             | GTCCAACAGTTTGATGACTATCAC  | 56                          |
|                | Vβ8               | GATGACATCATCAGGTTTTGTC    | 56                          |
|                | Vβ14              | CTTCTACCTCTGTGCCTGGAGT    | 58                          |
| Reverse primer | Jβ2               | TGAGAGCTGTCTCCTACTATCGATT | according to forward primer |
